# Supplementary material for: Folic acid modifies the shape of epithelial cells during morphogenesis via a Folr1 and MLCK dependent mechanism
Source: PubMed Central journal article supplement (PMC6361208; doi:10.1242/bio.041160), 2019-01-15
Supplement: biolopen-8-041160-s1.pdf [file biolopen-8-041160-s1.pdf]

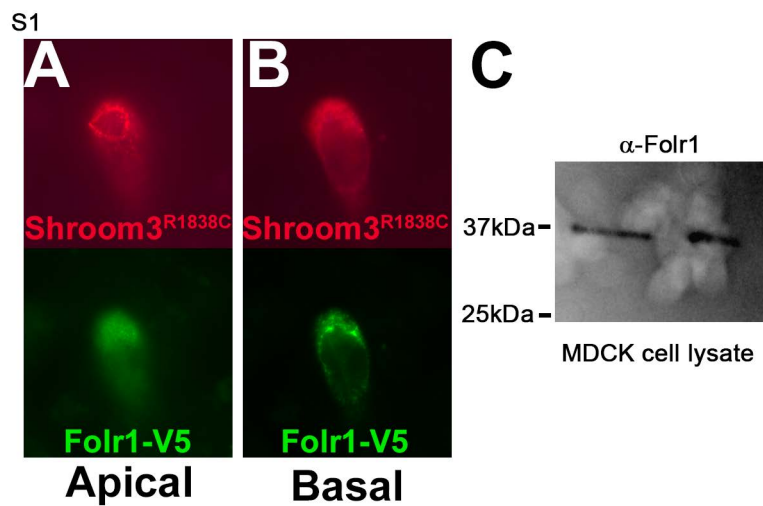

**Figure S1. Shroom3 and Folr1 protein co-expression.** (A-B) An apical and basal view of a representative MDCK cell expressing both the Shroom3<sup>R1838C</sup> and Folr1 expression vectors. Note that apical constriction occurs in cells expressing both proteins. (C) MDCK protein lysates were isolated and immunoblotted with a folr1 antibody. The numbers to the left indicate the approximate size of the protein detected which is consistent with its expected size.

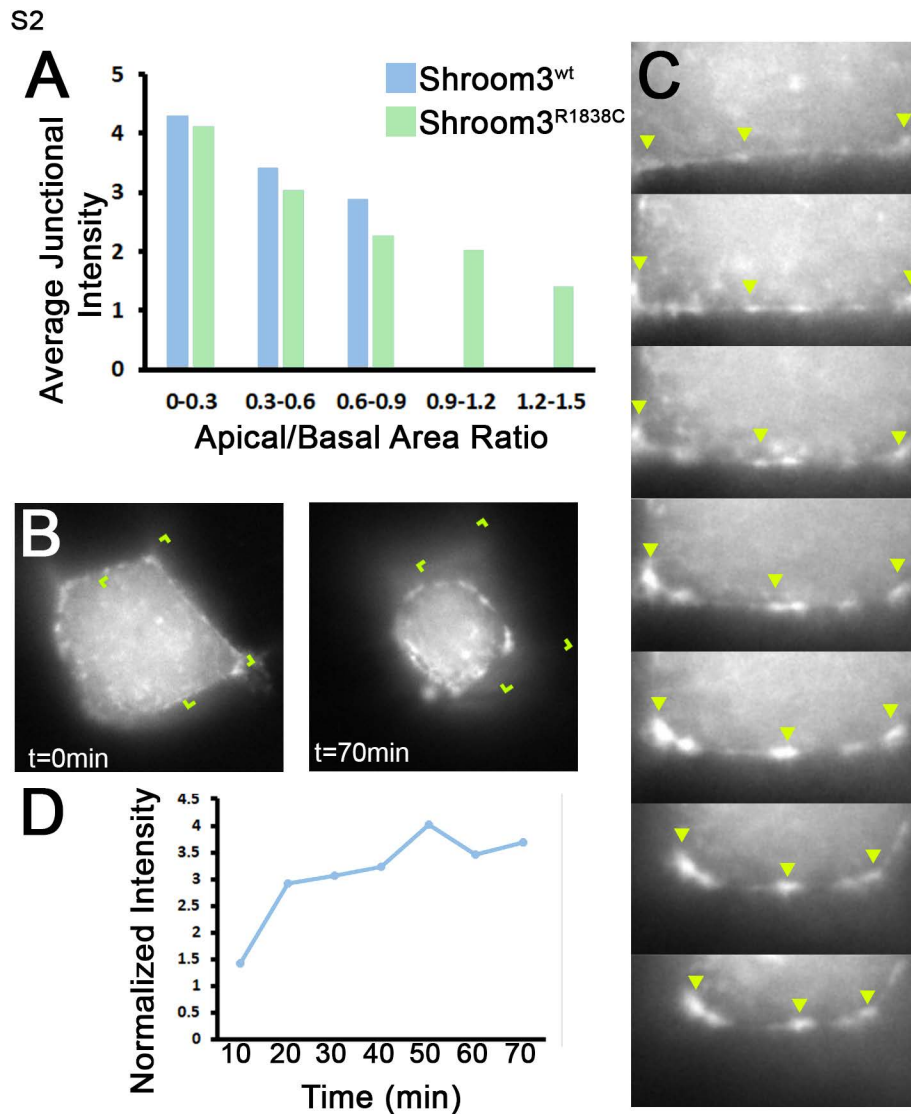

**Figure S2. Transgenic Shroom3 junctional intensity increases during apical constriction.**

(A) The apical junctional intensity of MDCK cells transfected with Shroom3<sup>wt</sup> or Shroom3<sup>R1838C</sup> was measured simultaneously with the corresponding cell's apical area following immunofluorescent labeling with a Shroom3 antibody. The average junctional Shroom3 immunofluorescent intensity of cells were calculated from binned groups possessing apical/basal area ratios (ABAR) of increments of 0.3. Note that as the ABAR ratio decreased, the junctional intensity increased. (B) Still frames of a Shroom3<sup>wt</sup>-mcherry transgenic MDCK cell imaged before and after apical constriction. The yellow brackets indicate the magnified image in panel C. (C) Still frames from a time-lapse video of a Shroom3<sup>wt</sup>-mcherry transgenic MDCK undergoing AC with a magnified view of an apical junction. The arrowheads represent spots of intense Shroom3 protein that move closer together with time. (D) The normalized intensity of the junction observed in C is plotted with time. Note that the increase in fluorescent intensity with time suggests that the density of Shroom3 protein may increase.

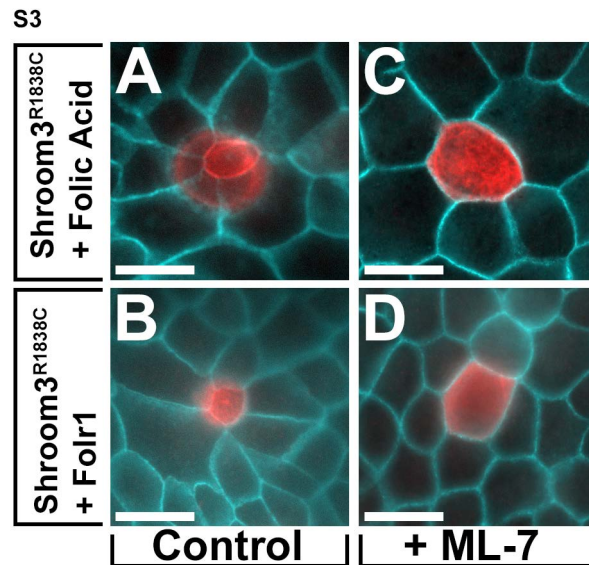

**Figure S3. ML-7 inhibits folic acid and folr1-mediated rescue of Shroom3 function.** (A-D). Apical views of representative MDCK cells expressing Shroom3<sup>R1838C</sup> treated with or without exogenous folic acid or co-expressed with folr1. Shroom3 (red) and  $\beta$ -catenin (turquoise) are immunofluorescently labeled. Note that ML-7 prevents apical constriction in Shroom3-folic acid and Shroom3-Folr1 positive cells.

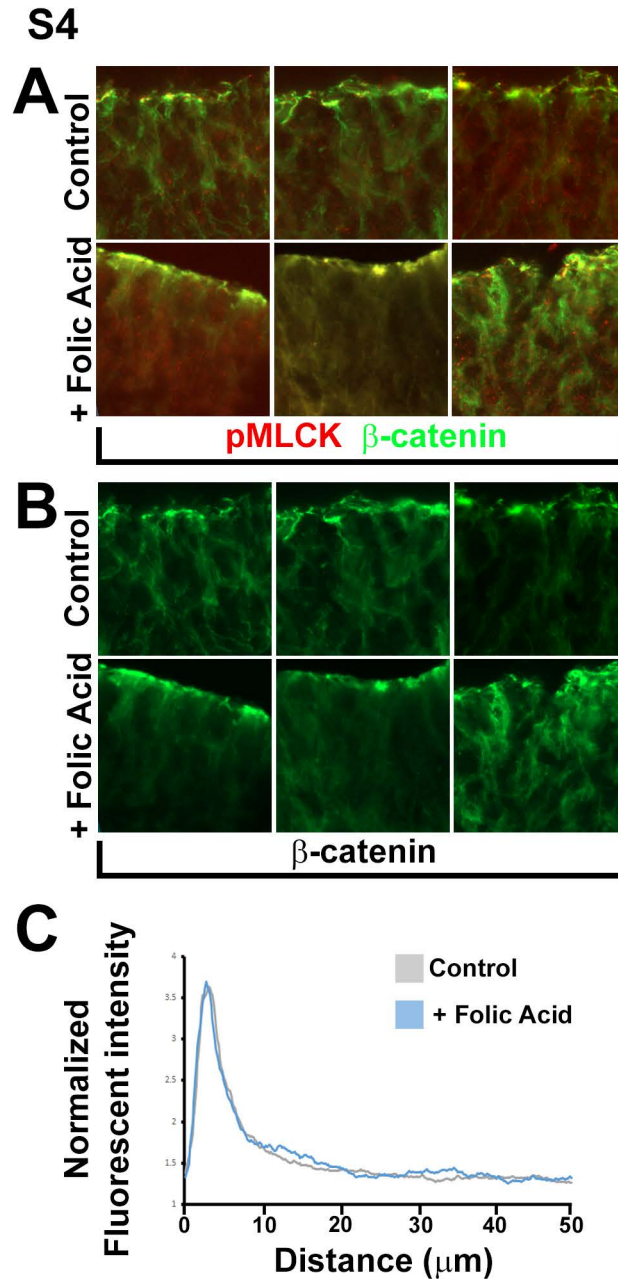

**Figure S4. Confirmation that beta-catenin fluorescent intensity is unaffected by exogenous folic acid.** (A-B). Co-immunofluorescent labeling of pMLCK and  $\beta$ -catenin (A) or only  $\beta$ -catenin labeling (B) from the images in figure 5D-E. (C) The fluorescent intensity of  $\beta$ -catenin along a 50  $\mu\text{m}$  apical/basal line was measured from the same images of cryosections used in (5D-E) and the mean intensity along the line was calculated. Note that unlike pMLCK, a difference between the experimental groups was not observed.

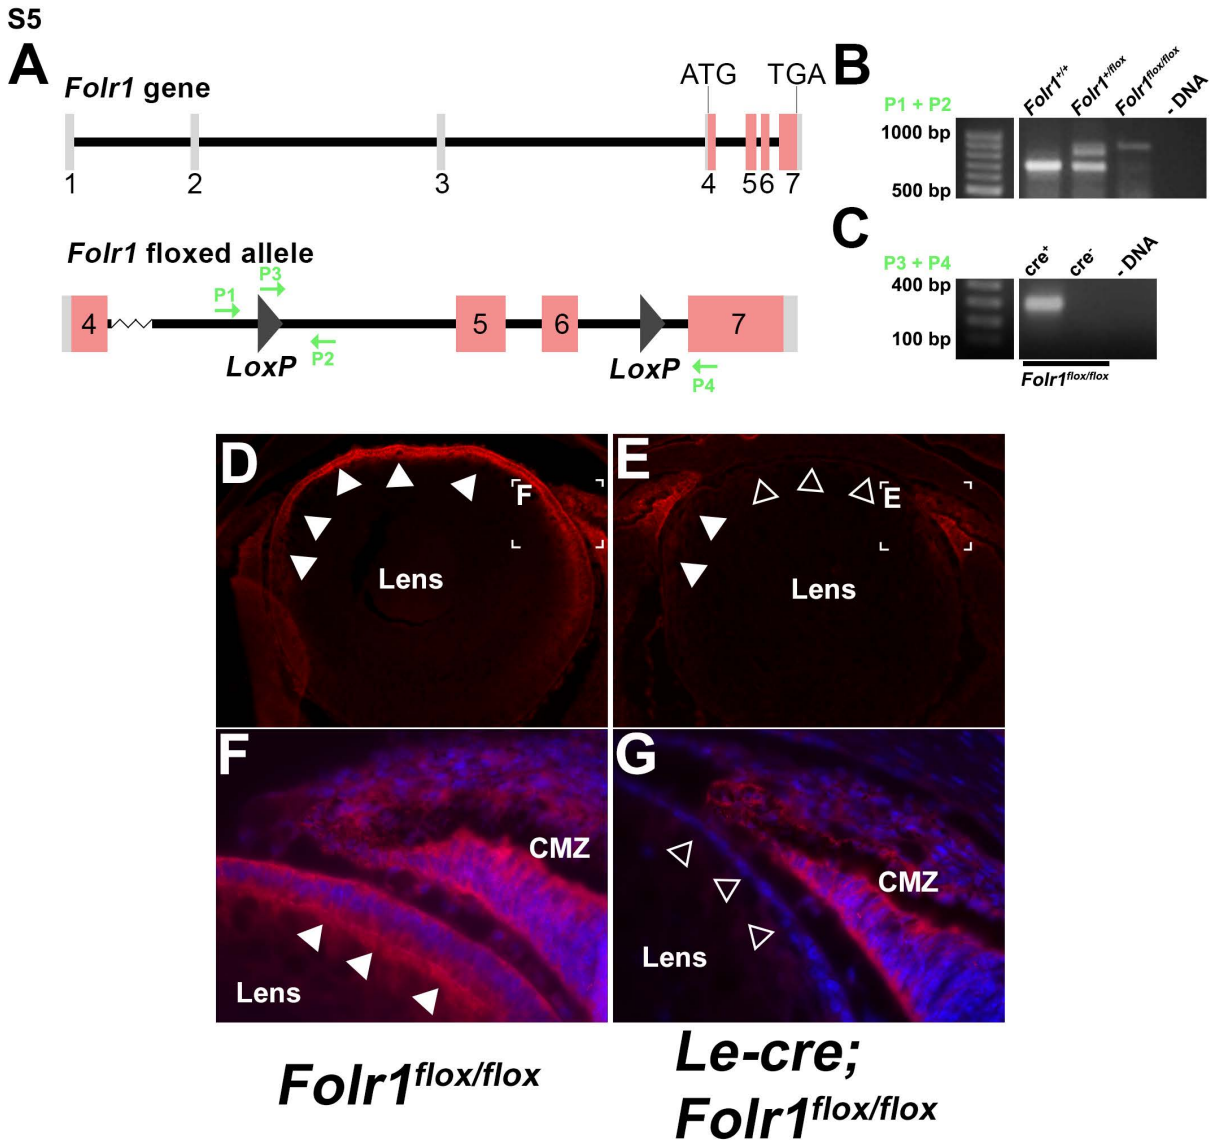

**Figure S5. Confirmation of *Folr1* recombination and protein loss following conditional deletion.** (A) Diagram of the exons and location of the start and stop sites of the endogenous mouse *Folr1* gene (top). The location of the LoxP sites between exons 4 and 7 are diagrammed along with the location of the PCR primers used for genotyping and recombination detection. (B) Genotyping PCR results generated from tail samples of pups born from a *Folr1*<sup>+/flox</sup> × *Folr1*<sup>+/flox</sup> cross. (C) PCR results on DNA isolated from lenses dissected from embryonic mouse eyes (E17.5) that are either *Folr1*<sup>flox/flox</sup>, *le-cre* or *Folr1*<sup>flox/flox</sup>. Note the presence of the recombination band indicating that the region between the LoxP sites has been deleted. (D-G) Histological cryosections of E18.5 mouse embryos with the indicated genotype immunofluorescently labeled with a *Folr1* antibody (red) and Hoechst (blue). Closed arrowheads indicate positive signal while open arrowheads indicate the absence of signal. Note that *Folr1* protein is specifically removed from the lens but not the ciliary margin (CMZ) upon *le-cre* mediated recombination.

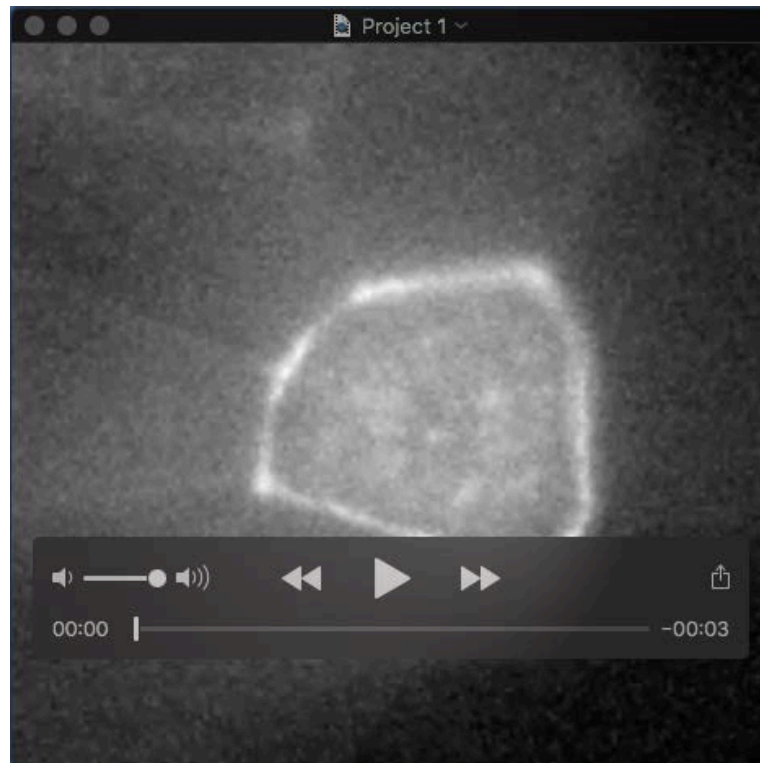

**Movie 1. Folic acid permits apical constriction in Shroom3<sup>R1838C</sup> positive cells.** Shroom3<sup>R1838C</sup>-mcherry positive MDCK cell treated with exogenous folic acid. Each frame represents 10minutes. Note that exogenous folic acid was added at the movie's onset.
